# Supplementary material
Source: PubMed Central journal article supplement (PMC5531287)
Supplement: NIHMS877145-supplement-supplement_1.pdf [file NIHMS877145-supplement-supplement_1.pdf]

## SUPPLEMENT

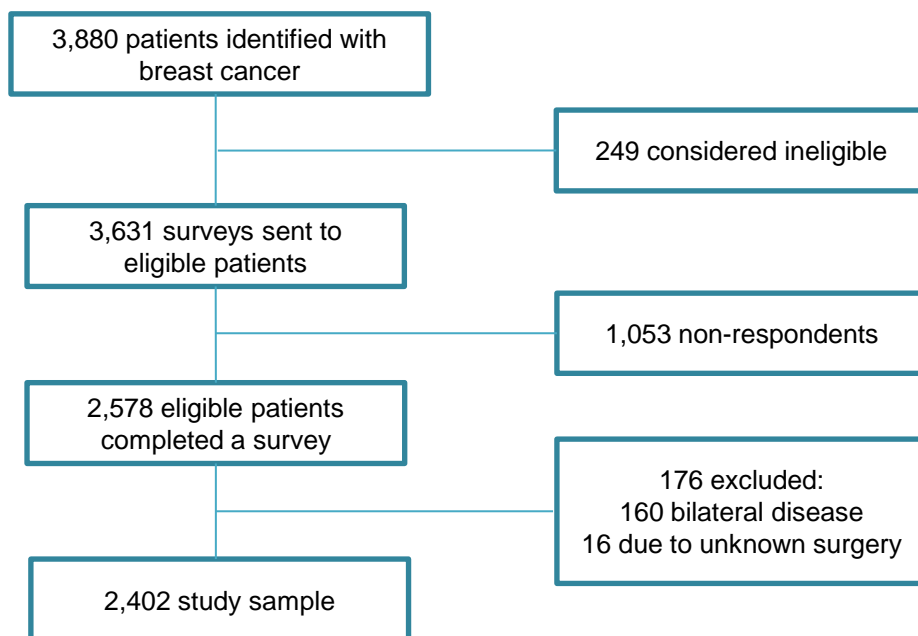

**eFigure: Sampling diagram.**

This figure depicts the evolution of the study sample from the original group of 3880 patients with breast cancer identified through the LA and Georgia SEER registries to the 2402 included in the analytic sample.
